# Supplementary material for: Effectiveness of ACB-IP 1.0 Universal Pathogen Free Concentrated Cocktail Convalescent Plasma in COVID-19 Infection
Source: Research Square preprint supplement (doi:10.21203/rs.3.rs-1042702/v1), 2021-11-09
Supplement: Supplementary file 1 [file b3143046869edea614922726.docx]

**Supplementa Data: 1**

**Donor Plasma Candidates**

| **ACU-IP 1.0** | Donor Gender | Donor  Age (yrs) | Blood Group |
| --- | --- | --- | --- |
| Plasma #1 | Male | 40s | 0 Rh + |
| Male | 30s | A Rh + |
| Male | 30s | B Rh + |
| Male | 50s | B Rh + |
| Plasma #2 | Female | 20s | 0 Rh + |
| Male | 30s | A Rh + |
| Male | 30s | B Rh + |
| Male | 50s | A Rh + |
| Male | 30s | A Rh - |
| Male | 20s | A Rh - |
| Male | 40s | 0 Rh + |
| Male | 40s | 0 Rh + |
| Plasma #3 | Male | 40s | 0 Rh + |
| Male | 50s | A Rh + |
| Male | 30s | A Rh - |
| Male | 30s | B Rh + |
| Male | 40s | 0 Rh + |
| Male | 40s | 0 Rh + |
| Female | 40s | A Rh + |
| Male | 50s | A Rh - |
| Plasma #4 | Male | 40s | 0 Rh + |
| Male | 40s | 0 Rh + |
| Male | 30s | 0 Rh + |
| Male | 30s | B Rh + |
| Male | 20s | A Rh - |
| Male | 30s | A Rh + |
| Male | 40s | A Rh + |
| Male | 40s | 0 Rh + |
| Plasma #5 | Female | 40s | A Rh + |
| Male | 40s | 0 Rh + |
| Male | 30s | 0 Rh + |
| Male | 40s | A Rh + |
| Male | 40s | 0 Rh + |
| Male | 50s | A Rh - |
| Male | 30s | A Rh - |
| Male | 40s | B Rh + |

| **Single Donor Plasma** | Donor Gender | Donor Age (yrs) | Blood Group |
| --- | --- | --- | --- |
| Plasma #1 | Male | 40s | 0 Rh + |
| Plasma #2 | Male | 30s | A Rh + |
| Plasma #3 | Male | 30s | B Rh + |
| Plasma #4 | Male | 50s | B Rh + |
| Plasma #5 | Male | 20s | A Rh + |
| Plasma #6 | Male | 40s | 0 Rh + |
